# Supplementary material for: CD93 maintains endothelial barrier function and limits metastatic dissemination
Source: JCI journal article supplement (doi:10.1172/jci.insight.169830), 2024-03-05
Supplement: sd1 [file 1]

You are being redirected.
